# Supplementary material
Source: PubMed Central journal article supplement (PMC2567855)
Supplement: jc.2008-0567_1.pdf [file jc.2008-0567_1.pdf]

## Appendix 1

A two-stage modeling approach was used to evaluate biomarker change over time in relation to the outcomes of interest as a specified endpoint. In the first stage, the six annual biomarker values from each woman were assumed to be from the following linear mixed model

$$\log(\text{biomarker}_{ij}) = b_{i1} + b_{i2}t_{ij} + e_{ij} \quad i = 1, 2, \dots, 50, \quad (1)$$

where  $t_{ij}$  is time since study,  $b_{i1}$  is the true biomarker value in log scale from woman  $i$ ,  $b_{i2}$  is her annual change rate, and  $e_{ij}$  is the measurement error. The woman-specific variables  $b_{i1}$  and  $b_{i2}$  are assumed to be from the following bivariate normal distribution

$$\begin{bmatrix} b_{i1} \\ b_{i2} \end{bmatrix} \sim N \left( \begin{bmatrix} \mu_1 \\ \mu_2 \end{bmatrix}, G = \begin{bmatrix} \sigma_{11} & \sigma_{12} \\ \sigma_{12} & \sigma_{22} \end{bmatrix} \right)$$

and are independent of the measurement error  $e_{ij}$ , which is assumed to be independent and identically distributed as  $N(0, \sigma_e^2)$ .

In the second stage, the relation between an endpoint of interest  $Y_i$  (such as age at the final menstrual period) and the woman-specific baseline value  $b_{i1}$  and change rate  $b_{i2}$  of a biomarker is evaluated in the following regression model

$$Y_i = \beta_0 + b_{i1}\beta_1 + b_{i2}\beta_2 + s_i^T \gamma_i + \epsilon_i \quad (2)$$

where  $\beta_1$  is the effect of the true baseline biomarker on  $Y$ ,  $\beta_2$  is the effect of the change rate of the biomarker on  $Y$ , adjusting for other possible covariates  $s_i$ , and  $\epsilon_i$  is the residual error.

However, the woman-specific variables  $b_{i1}$  and  $b_{i2}$  in model (2) are not observable. A common practice is to use the regression calibration approach where we replace  $b_{i1}$  and  $b_{i2}$  by their conditional means given the observed biomarker values in model (1) and then conduct regression analysis, which requires good estimates of the parameters  $\mu_1, \mu_2, G$  and  $\sigma_e^2$ . This approach works well when the measurement error  $\sigma_e^2$  in model (1) is small to moderate (Wang, Wang and Wang, 2000; Li, Zhang and Davidian, 2004). Our problem is further complicated by the fact that some of the biomarker values are below the corresponding detection limits.

Thiebaut et. al (2004) indicated that the maximum likelihood estimation of model (1) can be implemented using the non-linear mixed model procedure Proc NLMixed of SAS to address the below-detection values. After the maximum likelihood estimates of these parameters are obtained, numerical integration can be used to calculate the conditional means of  $b_{i1}$  and  $b_{i2}$  for the regression calibration model

$$Y_i = \beta_0 + \hat{b}_{i1}\beta_1 + \hat{b}_{i2}\beta_2 + s_i^T \gamma_i + \epsilon_i^*, \quad (3)$$

where  $\hat{b}_{i1}$  and  $\hat{b}_{i2}$  are conditional means of  $b_{i1}$  and  $b_{i2}$  given the biomarkers in model (1).

After the woman-specific variables  $b_{i1}$  and  $b_{i2}$  are replaced by their conditional means,  $\epsilon_i^*$  in model (3) tends to have unequal variances. Therefore, generalized estimating equation (GEE) approach as implemented in Proc Genmod of SAS, which only requires correct specification of the mean structure, is used to make inference of the regression parameters of interest in model (3).
